# Supplementary material
Source: Springer Nature journal article supplement (https://www.springermedizin.de/resource/supplementary/12876_2010_567_MOESM13_ESM.pdf/9437278)

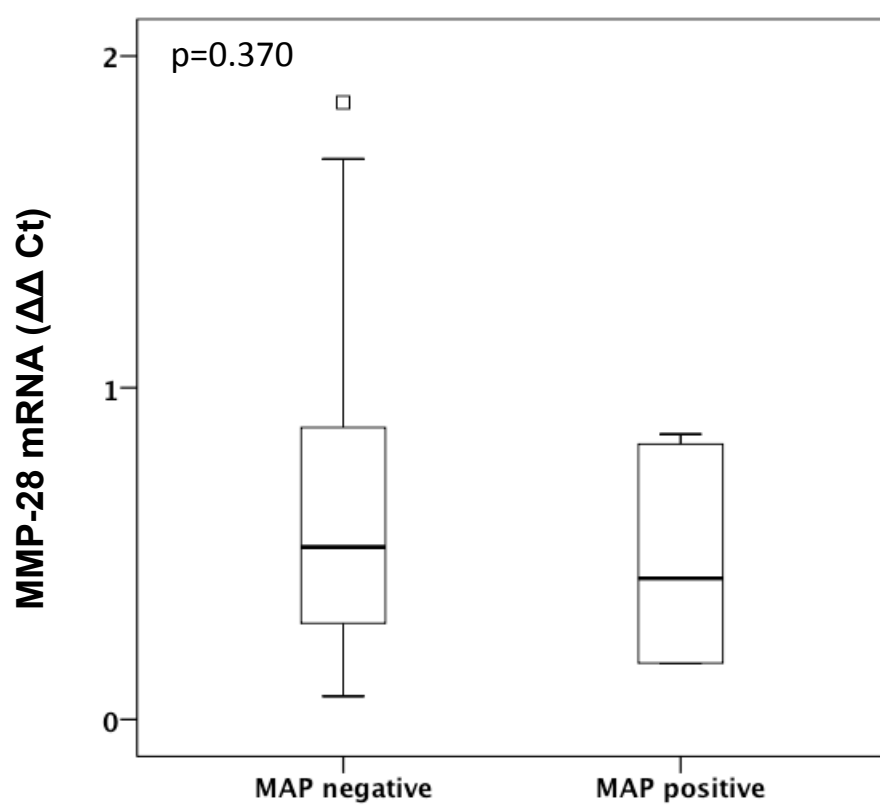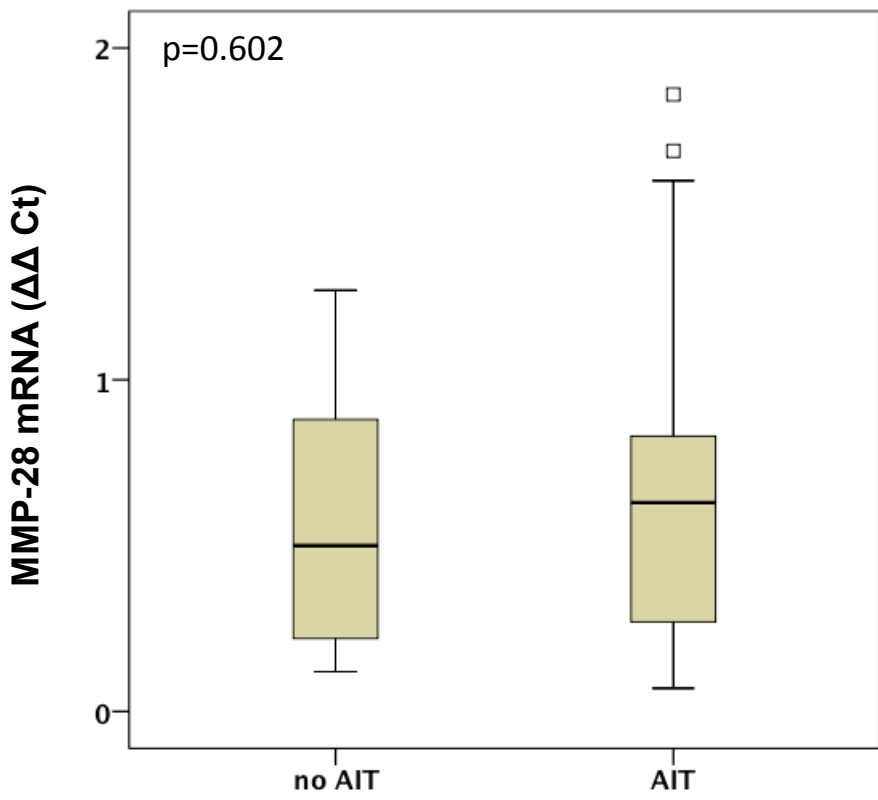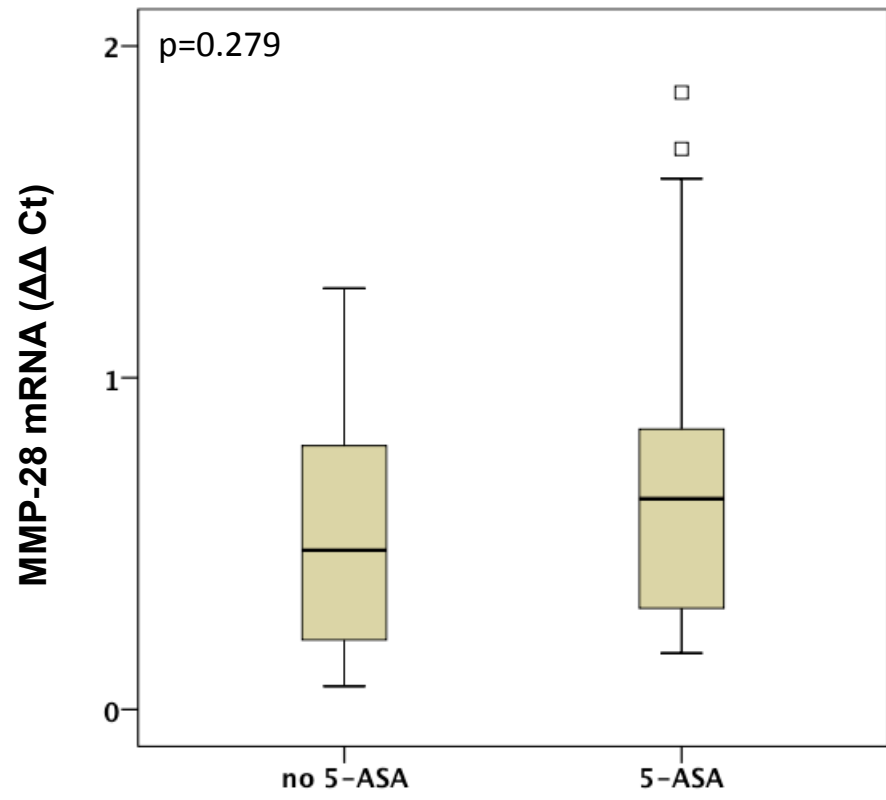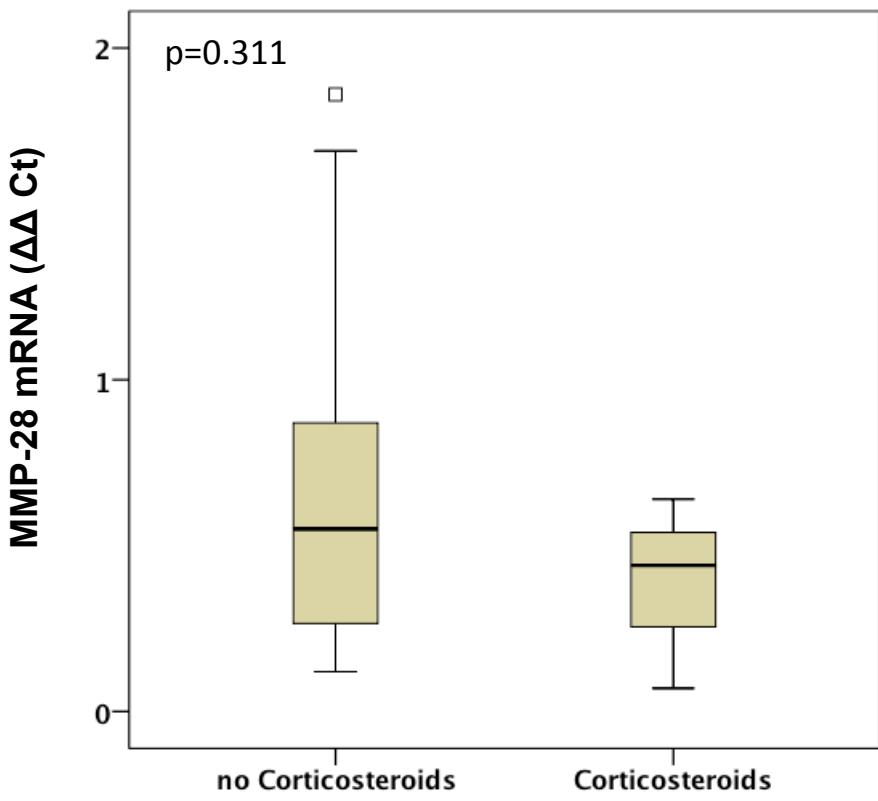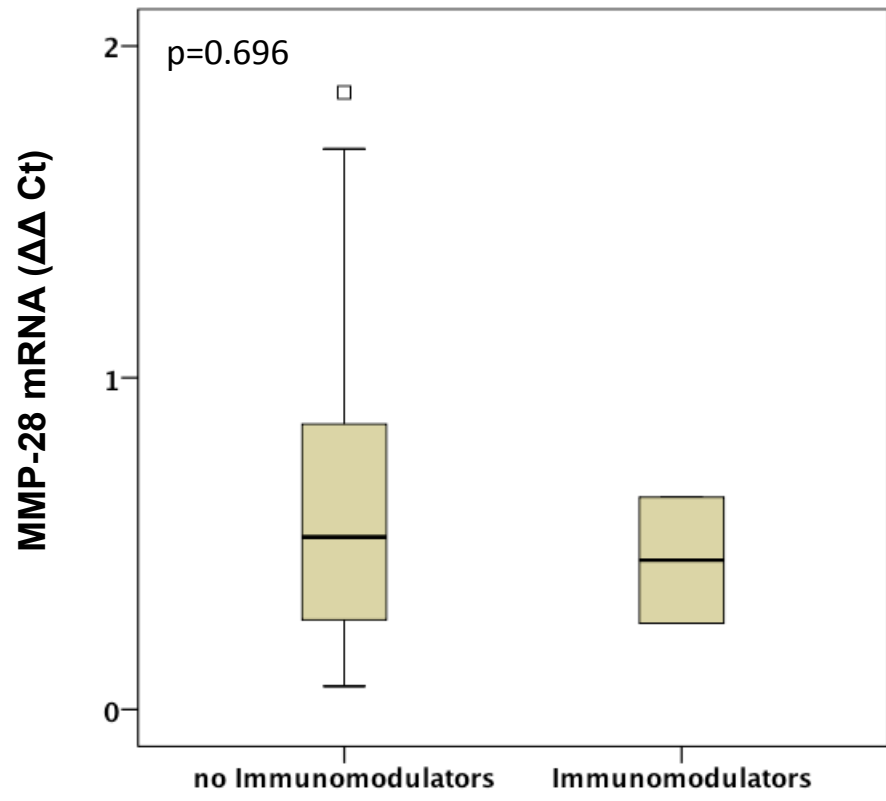

Supplement: MOESM13 [file 9437278]
